# Supplementary material for: Air-stable chiral double-decker Dy(iii) macrocycles with fluoride ion as the sole axial ligand
Source: Royal Society of Chemistry journal article supplement (doi:10.1039/d2dt02902b), 2022-01-01
Supplement: d2dt02902b1.pdf [file d2dt02902b1.pdf]

Supporting Information for

**Air-stable chiral double-decker Dy(III) macrocycles with fluoride ion as the sole axial ligand**

Xiaodong Liu,<sup>a, b</sup> Chen Zhao,<sup>a, b</sup> Jinjiang Wu,<sup>a, b</sup> Zhenhua Zhu<sup>a, c</sup> and Jinkui Tang<sup>\*a, b</sup>

<sup>a</sup>State Key Laboratory of Rare Earth Resource Utilization, Changchun Institute of Applied Chemistry, Chinese Academy of Sciences, Changchun 130022. E-mail: [tang@ciac.ac.cn](mailto:tang@ciac.ac.cn);

<sup>b</sup>School of Applied Chemistry and Engineering, University of Science and Technology of China, Hefei 230026

<sup>c</sup>University of Chinese Academy of Sciences, Beijing 100049

**Contents**

|                                         |        |
|-----------------------------------------|--------|
| 1. Synthesis and Characterization       | S2-S3  |
| 2. Single-crystal X-ray Crystallography | S4-S7  |
| 3. Magnetic Measurements                | S8-S12 |
| 4. References                           | S12    |

## 1. Synthesis and Characterization

### General Procedure

All manipulations described below were performed under aerobic conditions. The precursor complexes, **1-P** and **2-P**, were prepared in excellent yields according to a reported method.<sup>1</sup> Other reagents were purchased from commercial sources and used as received without further purification.

### Measurements

Elemental analyses (C, H, N) were performed on a Perkin-Elmer 2400 analyzer. FT-IR spectra were recorded with a Nicolet 6700 Flex FTIR spectrometer equipped with a smart iTR attenuated total reflectance (ATR) sampling accessory in the range from 4000 to 530  $\text{cm}^{-1}$ . Powder X-ray diffraction (PXRD) measurements were recorded on Bruker D8 advance X-Ray diffractometer using  $\text{Cu-K}\alpha$  radiation. The circular dichroism (CD) spectra data were collected on a Chirascan CD spectrometer (Applied Photophysics) at room temperature with scanning speed of 1  $\text{nm/s}$ . Thermogravimetric analyses (TGA) were performed on a Netzsch STA449F3 TG-DSC instrument with a nitrogen atmosphere in the range of 30-800  $^{\circ}\text{C}$  with a heating rate of 10  $\text{K min}^{-1}$ . All magnetic susceptibility measurements were carried on a Quantum Design MPMS-XL7 magnetometer equipped with a 7 T magnet. Single Crystal X-Ray diffraction data were collected using a Bruker Apex III CCD diffractometer with graphite-monochromated  $\text{Mo K}\alpha$  radiation ( $\alpha = 0.71073 \text{ \AA}$ ) at 180 K. Direct-current (dc) magnetic susceptibility measurements were collected with an external dc magnetic field of 1000 Oe in the temperature range of 2-300 K. The experimental magnetic susceptibility data were corrected for the diamagnetism estimated from Pascal's tables and sample holder calibration.<sup>2</sup> Alternative-current (ac) magnetic susceptibility data were collected in a zero dc field with a 3.0 Oe ac oscillating field in the temperature range 2-30 K.

### Synthesis

#### Synthesis Procedure for 1

The precursor **1-P** (324 mg, 0.4 mmol) and sodium tetraphenylboron (137 mg, 0.4 mmol) was added to a solution of NaF (101 mg, 2.4 mmol) in 40 mL DCM and 40 mL deionized water. The solution was then heated to reflux at 80 $^{\circ}\text{C}$  for 20 minutes. After cooling to room temperature, the organic phase was separated and filtered. Yellow crystals of **1** suitable for single-crystal X-ray measurement were obtained by the slow diffusion of n-hexane into above organic phase at room temperature for two days, affording a reproducible yield (34 mg, 7 % based on Dy). Elemental analysis (%) calcd for  $\text{C}_{134}\text{H}_{112}\text{B}_2\text{Cl}_4\text{Dy}_2\text{F}_4\text{N}_{12}$  ( $M_w = 2454.66$ ): C, 65.56; H, 4.60; N, 6.85. Found: C, 65.80; H, 4.65; N, 6.88. FTIR  $\nu/\text{cm}^{-1}$  (ART): 540 (s), 579 (s), 606 (s), 698 (s), 733 (m), 760 (m), 806 (m), 847 (m), 964 (m), 1009 (m), 1032 (m), 1072 (w), 1163 (m), 1265 (m), 1377 (m), 1454 (m), 1591 (m), 1651 (m), 3032 (m).

#### Synthetic Procedure for 2

The synthetic procedure of **2** is similar to that of **1**. Yield = 30 mg, (6% based on Dy). Elemental analysis (%) calcd for  $\text{C}_{134}\text{H}_{114}\text{B}_2\text{Cl}_4\text{Dy}_2\text{F}_4\text{N}_{12}\text{O}_1$  ( $M_w = 2472.67$ ): C, 65.08; H, 4.65; N, 6.80. Found: C, 64.95; H, 4.549; N, 6.83. FTIR  $\nu/\text{cm}^{-1}$  (ART): 532 (s), 548 (s), 579 (s), 613 (m), 698 (s), 733 (m), 762 (m), 806 (m), 847 (m), 966 (m), 1009 (m), 1032 (m), 1066 (w), 1163 (m), 1269 (m), 1375 (m), 1454 (m), 1591 (m), 1653 (m), 3030 (m).

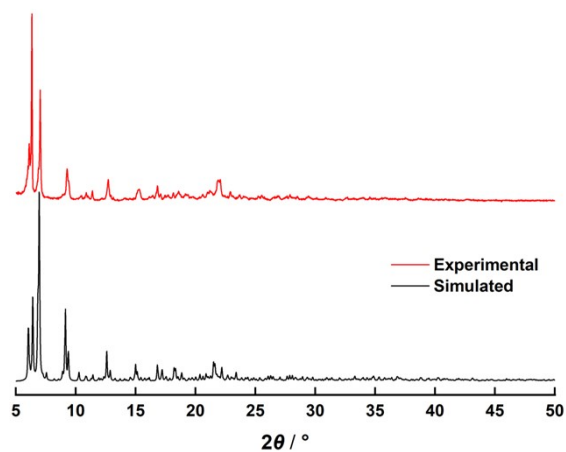

Fig. S1 PXR D data of 1.

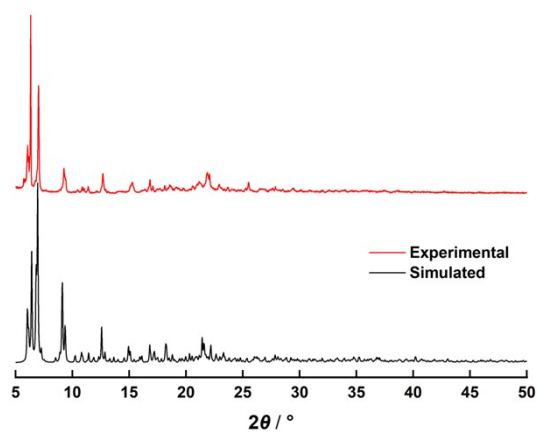

Fig. S2 PXR D data of 2.

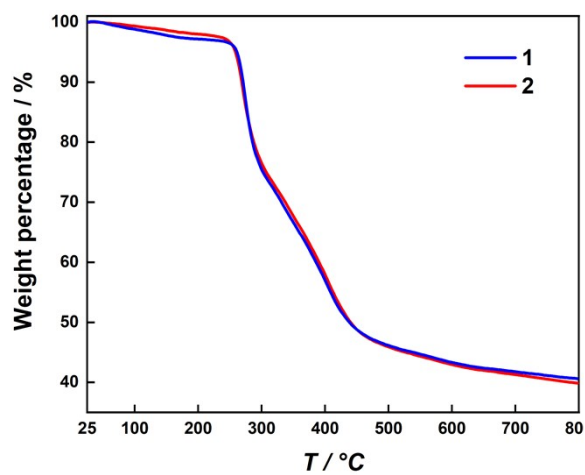

Fig. S3 Thermogravimetric analyses of 1 (blue line) and 2 (red line).

## 2. Single-crystal X-ray Crystallography

The structures of **1** and **2** were solved in Olex2 with SHELXT using intrinsic phasing and were refined with SHELXL using least squares minimization.<sup>3-5</sup> All non-hydrogen atoms were refined anisotropically. All hydrogen atom positions were calculated geometrically and refined using the riding model. Crystallographic data, refinement details are given in Tables S1-S4.

**Table S1.** Crystal Data and Structure Refinement for **1** and **2**.

| Compound reference                                  | 1                                                                                                               | 2                                                                                                               |
|-----------------------------------------------------|-----------------------------------------------------------------------------------------------------------------|-----------------------------------------------------------------------------------------------------------------|
| Chemical formula                                    | C <sub>136</sub> H <sub>116</sub> B <sub>2</sub> Cl <sub>8</sub> Dy <sub>2</sub> F <sub>4</sub> N <sub>12</sub> | C <sub>135</sub> H <sub>114</sub> B <sub>2</sub> Cl <sub>6</sub> Dy <sub>2</sub> F <sub>4</sub> N <sub>12</sub> |
| Formula Mass                                        | 2624.62                                                                                                         | 2539.70                                                                                                         |
| Temperature (K)                                     | 180                                                                                                             | 180                                                                                                             |
| Crystal system                                      | orthorhombic                                                                                                    | orthorhombic                                                                                                    |
| Space group                                         | <i>P</i> 2 <sub>1</sub> 2 <sub>1</sub> 2 <sub>1</sub>                                                           | <i>P</i> 2 <sub>1</sub> 2 <sub>1</sub> 2 <sub>1</sub>                                                           |
| <i>a</i> (Å)                                        | 17.2123 (5)                                                                                                     | 17.2406 (6)                                                                                                     |
| <i>b</i> (Å)                                        | 25.8184 (6)                                                                                                     | 25.9357 (10)                                                                                                    |
| <i>c</i> (Å)                                        | 27.5581 (8)                                                                                                     | 27.5500 (12)                                                                                                    |
| $\alpha$ (°)                                        | 90                                                                                                              | 90                                                                                                              |
| $\beta$ (°)                                         | 90                                                                                                              | 90                                                                                                              |
| $\gamma$ (°)                                        | 90                                                                                                              | 90                                                                                                              |
| Unit cell volume (Å <sup>3</sup> )                  | 12246.7 (6)                                                                                                     | 12318.9 (8)                                                                                                     |
| <i>Z</i>                                            | 4                                                                                                               | 4                                                                                                               |
| $\rho_{\text{calc}}$ (g/cm <sup>3</sup> )           | 1.424                                                                                                           | 1.369                                                                                                           |
| $\mu$ / mm <sup>-1</sup>                            | 1.447                                                                                                           | 1.394                                                                                                           |
| <i>F</i> (000)                                      | 5320                                                                                                            | 5152                                                                                                            |
| Radiation                                           | MoK $\alpha$ ( $\lambda$ = 0.71073)                                                                             | MoK $\alpha$ ( $\lambda$ = 0.71073)                                                                             |
| Reflections collected                               | 91773                                                                                                           | 80204                                                                                                           |
| Independent reflections                             | 21639                                                                                                           | 21727                                                                                                           |
| <i>R</i> <sub>int</sub>                             | 0.1061                                                                                                          | 0.0935                                                                                                          |
| GOF on <i>F</i> <sup>2</sup>                        | 1.065                                                                                                           | 1.056                                                                                                           |
| <i>R</i> <sub>1</sub> ( <i>I</i> ≥ 2σ ( <i>I</i> )) | 0.0544                                                                                                          | 0.0500                                                                                                          |
| <i>wR</i> <sub>2</sub> (all data)                   | 0.1403                                                                                                          | 0.1244                                                                                                          |
| Flack parameter                                     | 0.002(6)                                                                                                        | 0.001(6)                                                                                                        |
| CCDC number                                         | 2178369                                                                                                         | 2178368                                                                                                         |

**Table S2.** The CShM values calculated by SHAPE 2.1 for **1** and **2**. The lowest CShM value is highlighted by red color.<sup>6,7</sup>

| Coordination Geometry                                         | 1      |        | 2      |        |
|---------------------------------------------------------------|--------|--------|--------|--------|
|                                                               | Dy1    | Dy2    | Dy1    | Dy2    |
| Enneagon ( <i>D</i> <sub>9h</sub> )                           | 32.975 | 32.422 | 32.899 | 32.392 |
| Octagonal pyramid ( <i>C</i> <sub>8v</sub> )                  | 22.328 | 22.339 | 22.272 | 22.283 |
| Heptagonal bipyramid ( <i>D</i> <sub>7h</sub> )               | 14.743 | 14.784 | 14.693 | 14.841 |
| Johnson triangular cupola J3 ( <i>C</i> <sub>3v</sub> )       | 14.330 | 13.479 | 14.245 | 13.410 |
| Capped cube J8 ( <i>C</i> <sub>4v</sub> )                     | 8.272  | 8.528  | 8.265  | 8.579  |
| Spherical-relaxed capped cube ( <i>C</i> <sub>4v</sub> )      | 7.213  | 7.751  | 7.220  | 7.802  |
| Capped square antiprism J10 ( <i>C</i> <sub>4v</sub> )        | 7.884  | 9.192  | 7.902  | 9.264  |
| Spherical capped square antiprism ( <i>C</i> <sub>4v</sub> )  | 6.913  | 8.206  | 6.943  | 8.264  |
| Tricapped trigonal prism J51 ( <i>D</i> <sub>3h</sub> )       | 7.315  | 8.280  | 7.339  | 8.349  |
| Spherical tricapped trigonal prism ( <i>D</i> <sub>3h</sub> ) | 7.916  | 9.287  | 7.959  | 9.369  |
| Tridiminished icosahedron J63 ( <i>C</i> <sub>3v</sub> )      | 8.754  | 8.424  | 8.673  | 8.445  |
| Hula-hoop ( <i>C</i> <sub>2v</sub> )                          | 2.944  | 2.714  | 2.956  | 2.684  |
| Muffin ( <i>C</i> <sub>s</sub> )                              | 5.044  | 6.164  | 5.075  | 6.195  |

**Table S3.** Selected bond distances (Å) for **1** and **2**.

| <b>1</b> |           | <b>2</b> |           |
|----------|-----------|----------|-----------|
| Dy1-F1   | 2.264(8)  | Dy1-F1   | 2.102(6)  |
| Dy1-F2   | 2.268(6)  | Dy1-F2   | 2.270(5)  |
| Dy1-F3   | 2.267(6)  | Dy1-F3   | 2.271(6)  |
| Dy1-N1   | 2.630(9)  | Dy1-N1   | 2.640(8)  |
| Dy1-N2   | 2.654(10) | Dy1-N2   | 2.684(8)  |
| Dy1-N3   | 2.659(10) | Dy1-N3   | 2.648(9)  |
| Dy1-N4   | 2.635(10) | Dy1-N4   | 2.629(9)  |
| Dy1-N5   | 2.657(9)  | Dy1-N5   | 2.658(9)  |
| Dy1-N6   | 2.626(10) | Dy1-N6   | 2.652(8)  |
| Dy2-F2   | 2.271(6)  | Dy2-F2   | 2.282(5)  |
| Dy2-F3   | 2.262(6)  | Dy2-F3   | 2.256(5)  |
| Dy2-F4   | 2.105(7)  | Dy2-F4   | 2.266(7)  |
| Dy2-N7   | 2.672(9)  | Dy2-N7   | 2.669(10) |
| Dy2-N8   | 2.639(10) | Dy2-N8   | 2.650(9)  |
| Dy2-N9   | 2.661(9)  | Dy2-N9   | 2.629(9)  |
| Dy2-N10  | 2.706(10) | Dy2-N10  | 2.621(9)  |
| Dy2-N11  | 2.660(10) | Dy2-N11  | 2.677(8)  |
| Dy2-N12  | 2.646(9)  | Dy2-N12  | 2.637(9)  |

**Table S4.** Selected bond angles (°) for **1** and **2**.

| <b>1</b>   |          | <b>2</b>   |           |
|------------|----------|------------|-----------|
| Dy1-F2-Dy2 | 114.1(3) | Dy1-F2-Dy2 | 113.6(2)  |
| Dy1-F3-Dy2 | 114.4(3) | Dy1-F3-Dy2 | 114.5(2)  |
| F1-Dy1-F2  | 144.9(2) | F1-Dy1-F2  | 147.7(2)  |
| F1-Dy1-F3  | 149.1(2) | F1-Dy1-F3  | 146.4(0)  |
| F1-Dy1-N1  | 73.0(3)  | F1-Dy1-N1  | 73.8(3)   |
| F1-Dy1-N2  | 81.3(3)  | F1-Dy1-N2  | 80.2(3)   |
| F1-Dy1-N3  | 94.6(3)  | F1-Dy1-N3  | 90.4(3)   |
| F1-Dy1-N4  | 73.4(3)  | F1-Dy1-N4  | 74.3(3)   |
| F1-Dy1-N5  | 77.0(3)  | F1-Dy1-N5  | 80.9(3)   |
| F1-Dy1-N6  | 89.8(3)  | F1-Dy1-N6  | 91.2(3)   |
| F2-Dy1-F3  | 65.7(2)  | F2-Dy1-F3  | 65.93(18) |
| F2-Dy1-N1  | 129.7(3) | F2-Dy1-N1  | 126.5(3)  |
| F2-Dy1-N2  | 131.5(3) | F2-Dy1-N2  | 130.4(2)  |
| F2-Dy1-N3  | 93.4(3)  | F2-Dy1-N3  | 96.9(2)   |
| F2-Dy1-N4  | 81.2(3)  | F2-Dy1-N4  | 82.2(3)   |
| F2-Dy1-N5  | 69.5(3)  | F2-Dy1-N5  | 68.2(2)   |
| F2-Dy1-N6  | 82.7(3)  | F2-Dy1-N6  | 81.2(3)   |
| F3-Dy1-N1  | 80.7(3)  | F3-Dy1-N1  | 81.2(3)   |
| F3-Dy1-N2  | 71.7(3)  | F3-Dy1-N2  | 68.0(2)   |
| F3-Dy1-N3  | 84.8(3)  | F3-Dy1-N3  | 83.2(3)   |
| F3-Dy1-N4  | 130.3(3) | F3-Dy1-N4  | 128.0(3)  |
| F3-Dy1-N5  | 129.6(3) | F3-Dy1-N5  | 130.4(3)  |
| F3-Dy1-N6  | 91.6(3)  | F3-Dy1-N6  | 95.9(3)   |
| N1-Dy1-N2  | 60.8(3)  | N1-Dy1-N2  | 61.1(3)   |
| N1-Dy1-N3  | 120.7(3) | N1-Dy1-N3  | 120.6(3)  |
| N1-Dy1-N4  | 146.4(3) | N1-Dy1-N4  | 148.1(3)  |
| N1-Dy1-N5  | 112.9(3) | N1-Dy1-N5  | 113.0(3)  |
| N1-Dy1-N6  | 61.1(3)  | N1-Dy1-N6  | 60.7(3)   |
| N2-Dy1-N3  | 60.0(3)  | N2-Dy1-N3  | 60.0(2)   |
| N2-Dy1-N4  | 111.7(3) | N2-Dy1-N4  | 113.7(3)  |

---

|             |          |             |           |
|-------------|----------|-------------|-----------|
| N2-Dy1-N5   | 158.2(3) | N2-Dy1-N5   | 161.1(3)  |
| N2-Dy1-N6   | 121.3(3) | N2-Dy1-N6   | 121.2(3)  |
| N3-Dy1-N4   | 60.3(3)  | N3-Dy1-N4   | 60.2(3)   |
| N3-Dy1-N5   | 120.3(3) | N3-Dy1-N5   | 120.4(3)  |
| N3-Dy1-N6   | 175.6(3) | N3-Dy1-N6   | 178.1(3)  |
| N4-Dy1-N5   | 60.7(3)  | N4-Dy1-N5   | 60.7(3)   |
| N4-Dy1-N6   | 120.9(3) | N4-Dy1-N6   | 119.5(3)  |
| N5-Dy1-N6   | 60.3(3)  | N5-Dy1-N6   | 59.0(3)   |
| F4-Dy2-F2   | 148.2(3) | F2-Dy2-F3   | 65.98(18) |
| F4-Dy2-F3   | 146.0(3) | F2-Dy2-F4   | 144.9(2)  |
| F4-Dy2-N7   | 80.2(3)  | F2-Dy2-N7   | 93.7(3)   |
| F4-Dy2-N8   | 73.8(3)  | F2-Dy2-N8   | 131.5(2)  |
| F4-Dy2-N9   | 91.4(3)  | F2-Dy2-N9   | 130.0(3)  |
| F4-Dy2-N10  | 80.9(3)  | F2-Dy2-N10  | 82.4(3)   |
| F4-Dy2-N11  | 74.3(3)  | F2-Dy2-N11  | 69.1(2)   |
| F4-Dy2-N12  | 90.5(3)  | F2-Dy2-N12  | 81.7(3)   |
| F2-Dy2-F3   | 65.7(2)  | F3-Dy2-F4   | 148.9(2)  |
| F2-Dy2-N7   | 130.0(3) | F3-Dy2-N7   | 84.7(3)   |
| F2-Dy2-N8   | 126.3(3) | F3-Dy2-N8   | 71.4(3)   |
| F2-Dy2-N9   | 80.9(3)  | F3-Dy2-N9   | 80.9(2)   |
| F2-Dy2-N10  | 68.7(3)  | F3-Dy2-N10  | 91.8(3)   |
| F2-Dy2-N11  | 82.4(3)  | F3-Dy2-N11  | 129.4(2)  |
| F2-Dy2-N12  | 96.8(3)  | F3-Dy2-N12  | 130.5(3)  |
| F3-Dy2-N7   | 67.6(3)  | F4-Dy2-N7   | 94.1(2)   |
| F3-Dy2-N8   | 80.8(3)  | F4-Dy2-N8   | 81.3(2)   |
| F3-Dy2-N9   | 95.9(3)  | F4-Dy2-N9   | 72.9(2)   |
| F3-Dy2-N10  | 130.7(3) | F4-Dy2-N10  | 90.2(3)   |
| F3-Dy2-N11  | 128.6(3) | F4-Dy2-N11  | 77.4(2)   |
| F3-Dy2-N12  | 83.2(3)  | F4-Dy2-N12  | 72.9(2)   |
| N7-Dy2-N8   | 60.5(3)  | N7-Dy2-N8   | 59.7(3)   |
| N7-Dy2-N9   | 121.2(3) | N7-Dy2-N9   | 120.3(3)  |
| N7-Dy2-N10  | 161.1(3) | N7-Dy2-N10  | 175.6(3)  |
| N7-Dy2-N11  | 114.6(3) | N7-Dy2-N11  | 120.6(3)  |
| N7-Dy2-N12  | 60.3(3)  | N7-Dy2-N12  | 60.1(3)   |
| N8-Dy2-N9   | 61.2(3)  | N8-Dy2-N9   | 60.8(3)   |
| N8-Dy2-N10  | 113.1(3) | N8-Dy2-N10  | 121.6(3)  |
| N8-Dy2-N11  | 148.1(3) | N8-Dy2-N11  | 158.7(3)  |
| N8-Dy2-N12  | 120.5(3) | N8-Dy2-N12  | 111.2(3)  |
| N9-Dy2-N10  | 58.7(3)  | N9-Dy2-N10  | 61.5(3)   |
| N9-Dy2-N11  | 118.6(3) | N9-Dy2-N11  | 112.9(3)  |
| N9-Dy2-N12  | 177.7(3) | N9-Dy2-N12  | 145.7(3)  |
| N10-Dy2-N11 | 60.2(3)  | N10-Dy2-N11 | 59.9(3)   |
| N10-Dy2-N12 | 120.5(3) | N10-Dy2-N12 | 121.1(3)  |
| N11-Dy2-N12 | 60.8(3)  | N11-Dy2-N12 | 61.3(3)   |

---

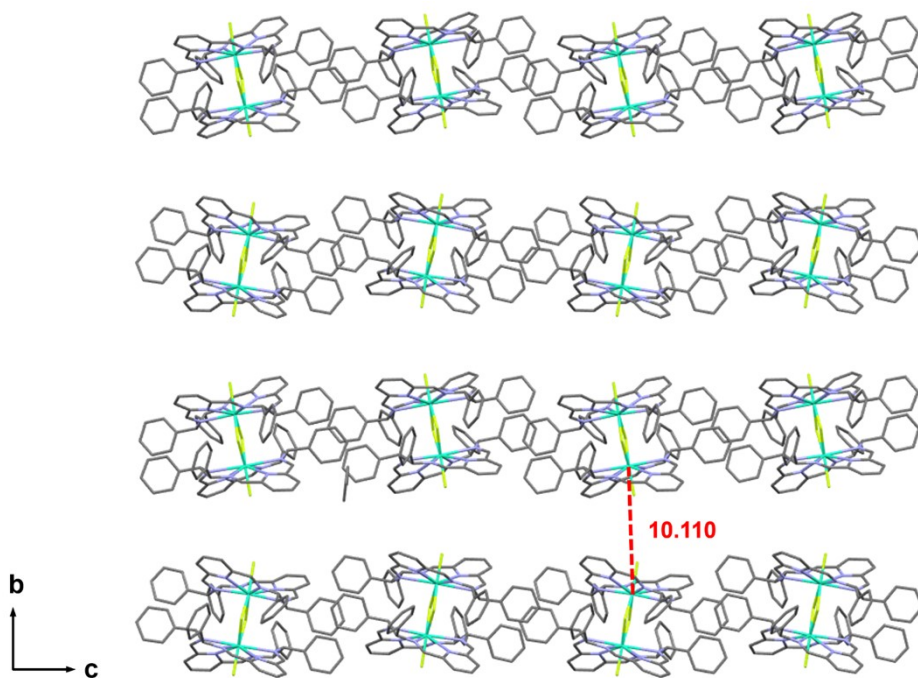

**Fig. S4** The packing diagram for **1** gives the shortest intermolecular Dy···Dy distance of 10.110 Å.

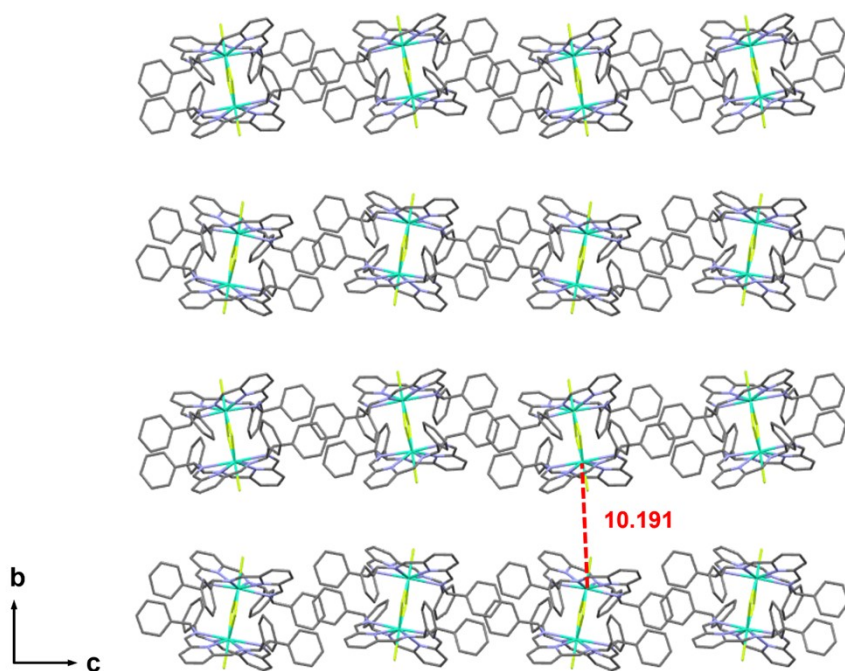

**Fig. S5** The packing diagram for **2** gives the shortest intermolecular Dy···Dy distance of 10.191 Å.

### 3. Magnetic measurements

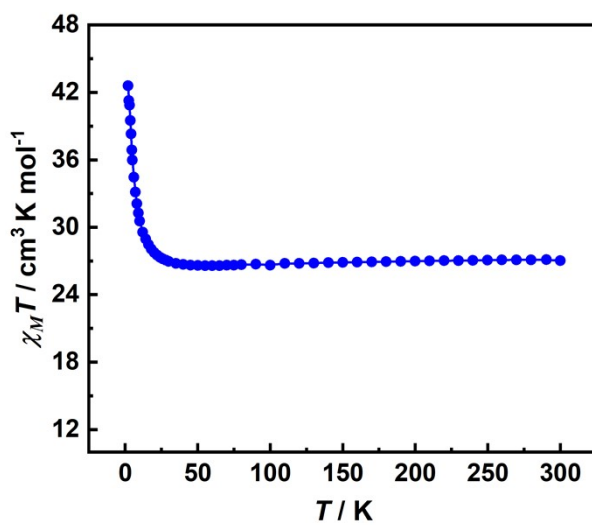

Fig. S6  $\chi_M T$  vs.  $T$  plot of 1.

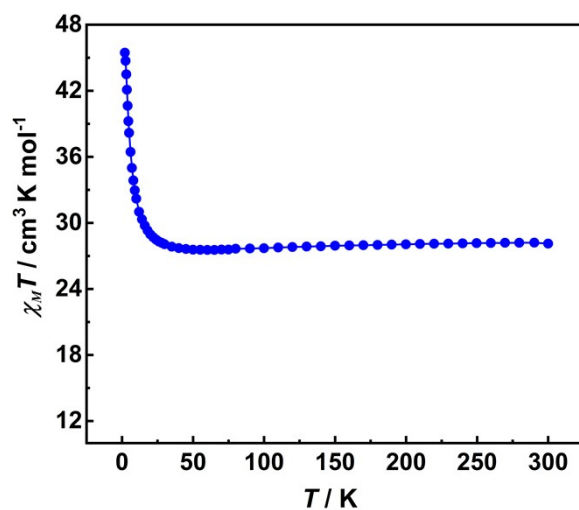

Fig. S7  $\chi_M T$  vs.  $T$  plot of 2.

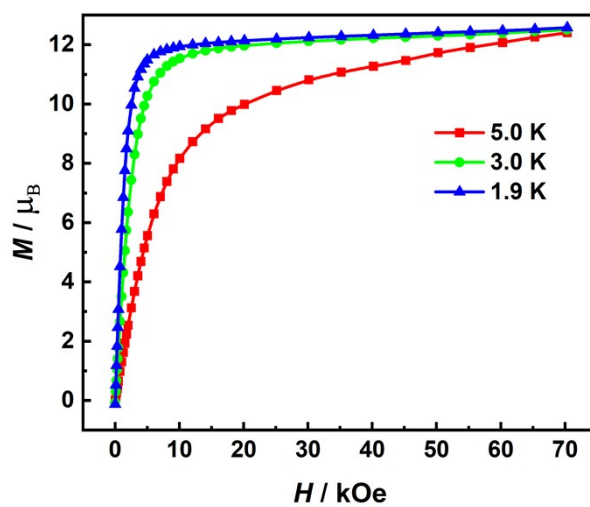

Fig. S8 Field dependence of the magnetization at 1.9, 3 and 5 K for 1.



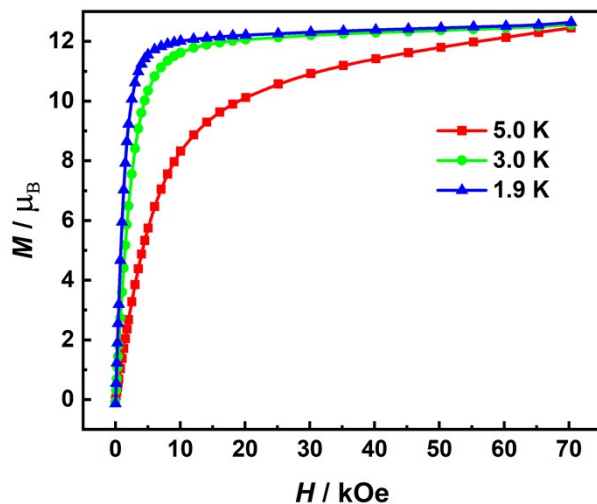

**Fig. S9** Field dependence of the magnetization at 1.9, 3 and 5 K for 2.

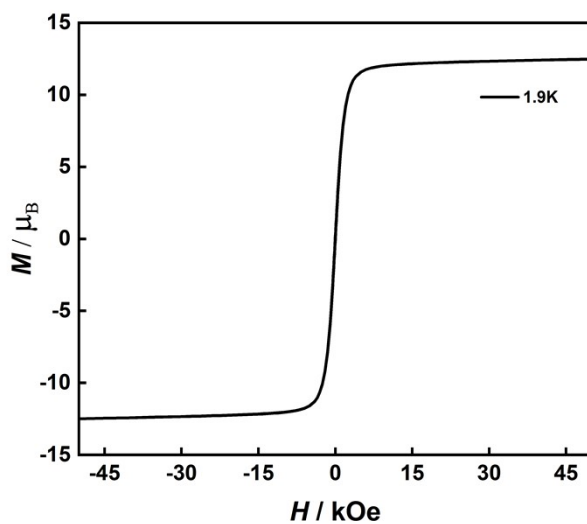

**Fig. S10** Magnetic hysteresis of solid 1 at 1.9 K using an average sweep rate of 31 Oe/s.

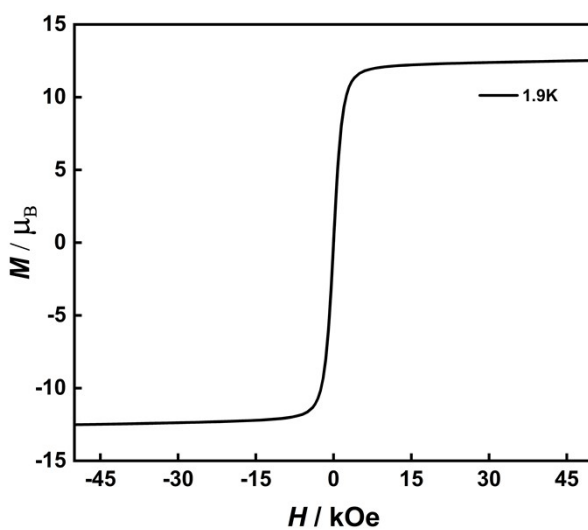

**Fig. S11** Magnetic hysteresis of solid 2 at 1.9 K using an average sweep rate of 31 Oe/s.

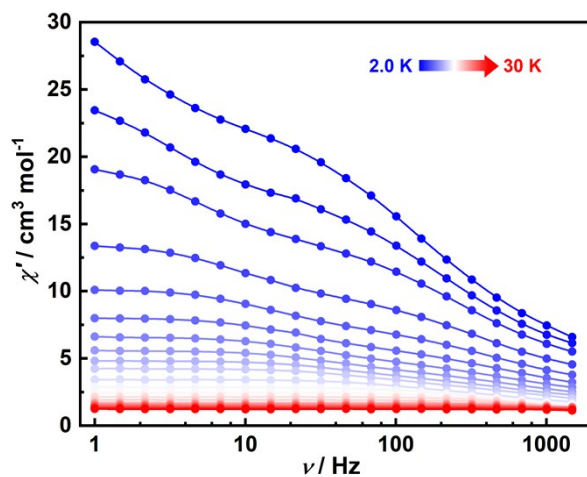

**Fig. S12** Frequency dependence of the in-phase susceptibility ( $\chi'$ ) for **1** under a zero dc field at ac frequencies of 1-1488 Hz in the temperature range of 2 to 30 K.

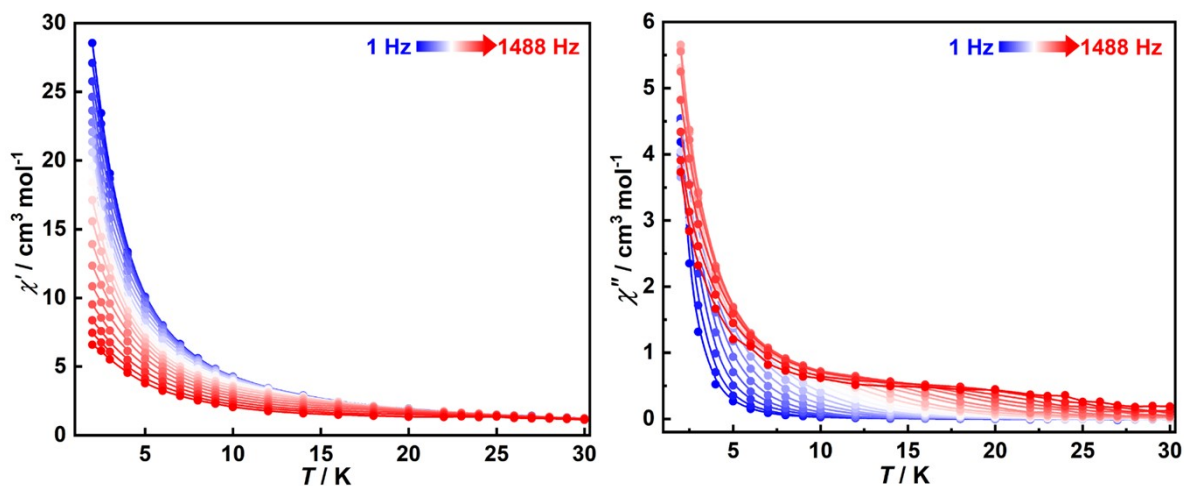

**Fig. S13** Temperature dependence of the in-phase (left) and out-of-phase (right) susceptibility for **1** under a zero dc field in ac frequencies of 1-1488 Hz.

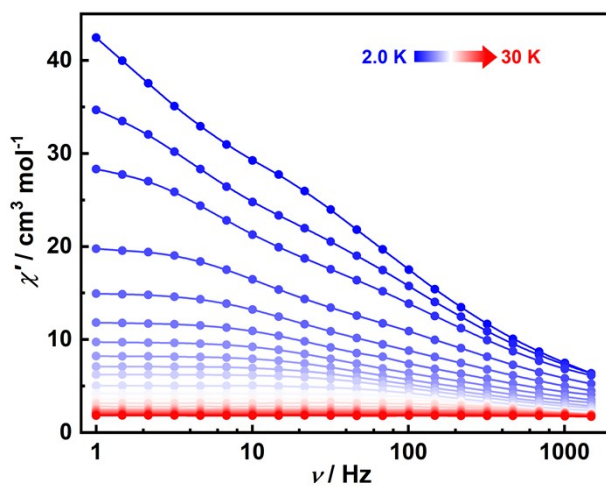

**Fig. S14** Frequency dependence of the in-phase susceptibility ( $\chi'$ ) for **2** under zero dc field at ac frequencies of 1-1488 Hz in the temperature range of 2 to 30 K.

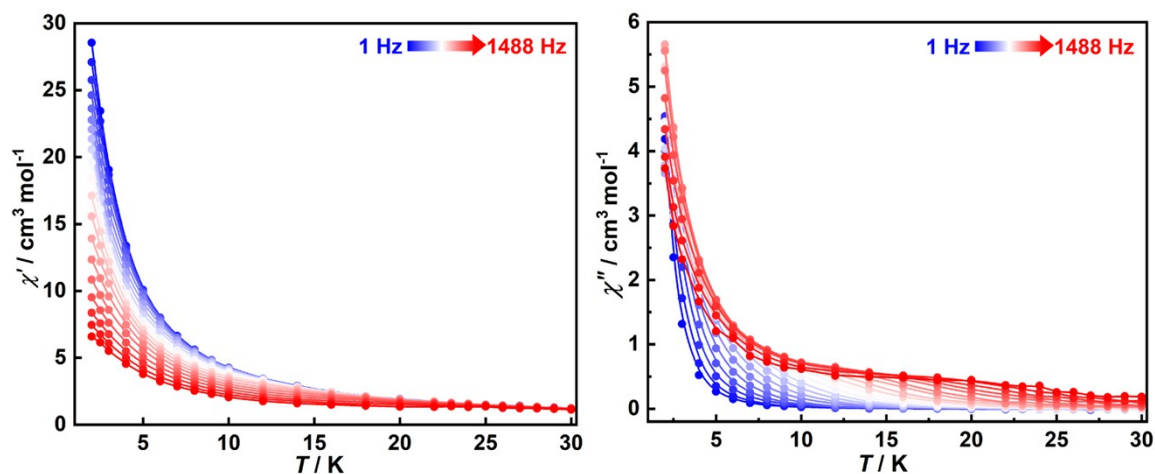

**Fig. S15** Temperature dependence of the in-phase (left) and out-of-phase (right) susceptibility for **2** under a zero dc field in ac frequencies of 1-1488 Hz.

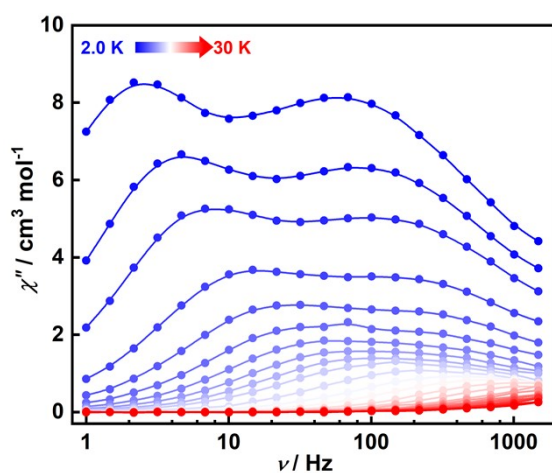

**Fig. S16** Frequency dependence of the out-of-phase susceptibility ( $\chi''$ ) for **2** under a zero dc field at ac frequencies of 1-1488 Hz in the temperature range of 2 to 30 K.

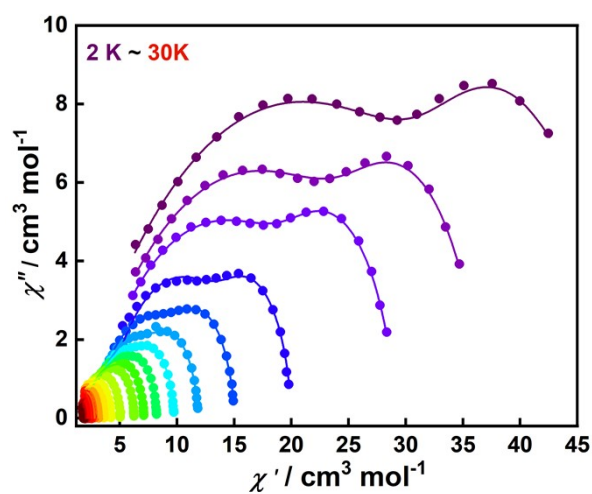

**Fig. S17** Cole-Cole plot for **2**. The solid lines are obtained by fitting experimental data with CC-FIT2.<sup>8</sup>

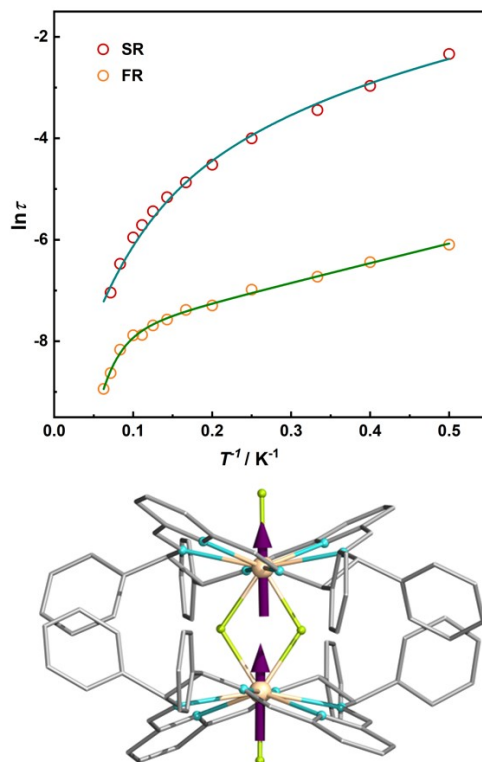

**Fig. S18** (Top) Temperature-dependent relaxation time for **2**. The solid lines represent the fitting with parameters of  $U_{\text{eff}} = 26(2) \text{ cm}^{-1}$ ,  $\tau_0 = 10^{-3.5(3)} \text{ s}$ ,  $C = 2.5(6) \text{ s}^{-1} \text{ K}^{-n}$ ,  $n = 2.2(2)$  for the SR process and  $U_{\text{eff}} = 3.0(1) \text{ cm}^{-1}$ ,  $\tau_0 = 10^{-3.5(1)} \text{ s}$ ,  $C = 0.05(7) \text{ s}^{-1} \text{ K}^{-n}$ ,  $n = 4.2(5)$  for the FR process. (Bottom) The purple rows represent the orientation of the anisotropy axis of the individual Dy(III) in **2** as calculated by Magellan software.<sup>9</sup>

#### 4. References

1. C. Zhao, Z. Zhu, X.-L. Li and J. Tang, *Inorg. Chem. Front.*, 2022, **9**, 4049-4055.
2. E. A. Boudreaux and L. N. Mulay, *John Wiley & Sons: New York*, 1976.
3. O. V. Dolomanov, L. J. Bourhis, R. J. Gildea, J. A. K. Howard and H. Puschmann, *J. Appl. Crystallogr.*, 2009, **42**, 339-341.
4. G. M. Sheldrick, *Acta Crystallogr. Sect. C-Struct. Chem.*, 2015, **71**, 3-8.
5. G. M. Sheldrick, *Acta Crystallogr. Sect. A*, 2015, **71**, 3-8.
6. M. Pinsky and D. Avnir, *Inorg. Chem.*, 1998, **37**, 5575-5582.
7. D. Casanova, J. Cirera, M. Llunell, P. Alemany, D. Avnir and S. Alvarez, *J. Am. Chem. Soc.*, 2004, **126**, 1755-1763.
8. D. Reta and N. F. Chilton, *Phys. Chem. Chem. Phys.*, 2019, **21**, 23567-23575.
9. N. F. Chilton, D. Collison, E. J. McInnes, R. E. Winpenney and A. Soncini, *Nat. Commun.*, 2013, **4**, 2551.
